# Supplementary material for: Essential Oil of <em>Lippia origanoides</em> H.B.K.: A Promising Compound Acetylcholinesterase Inhibitors for the Treatment of Alzheimer’s Disease
Source: Preprints.org preprint supplement (doi:10.20944/preprints202109.0261.v1), 2021-09-15

**Figure S1:** Mass spectra of the major compounds of the essential oil obtained by hydrodistillation of the aerial parts of *L. origanoides*.

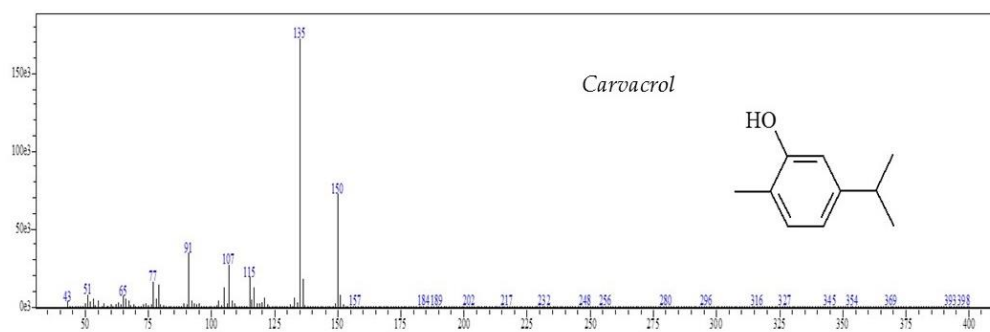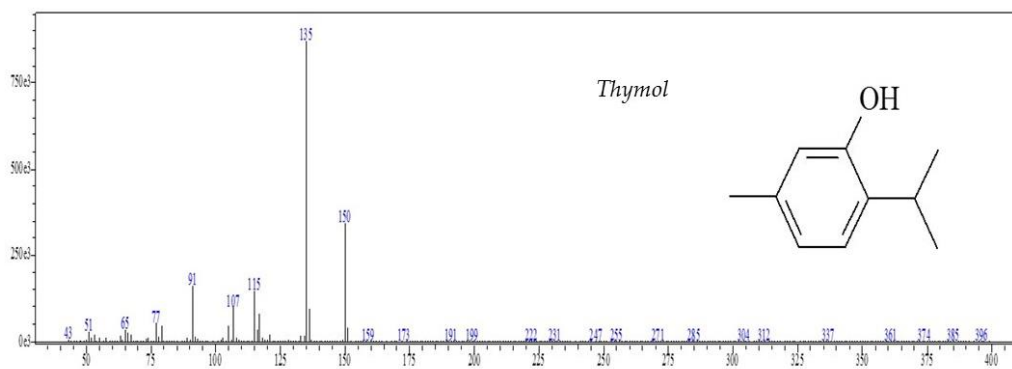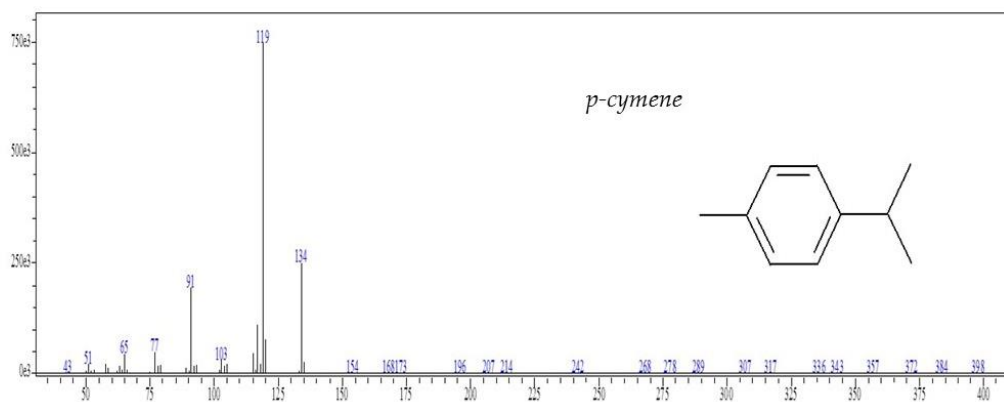

**Figure S2:** Schematic representations of the molecular interactions of carvacrol (A), thymol (B) and p-cymene (C) with amino acid residues of the E20 site of AchE.

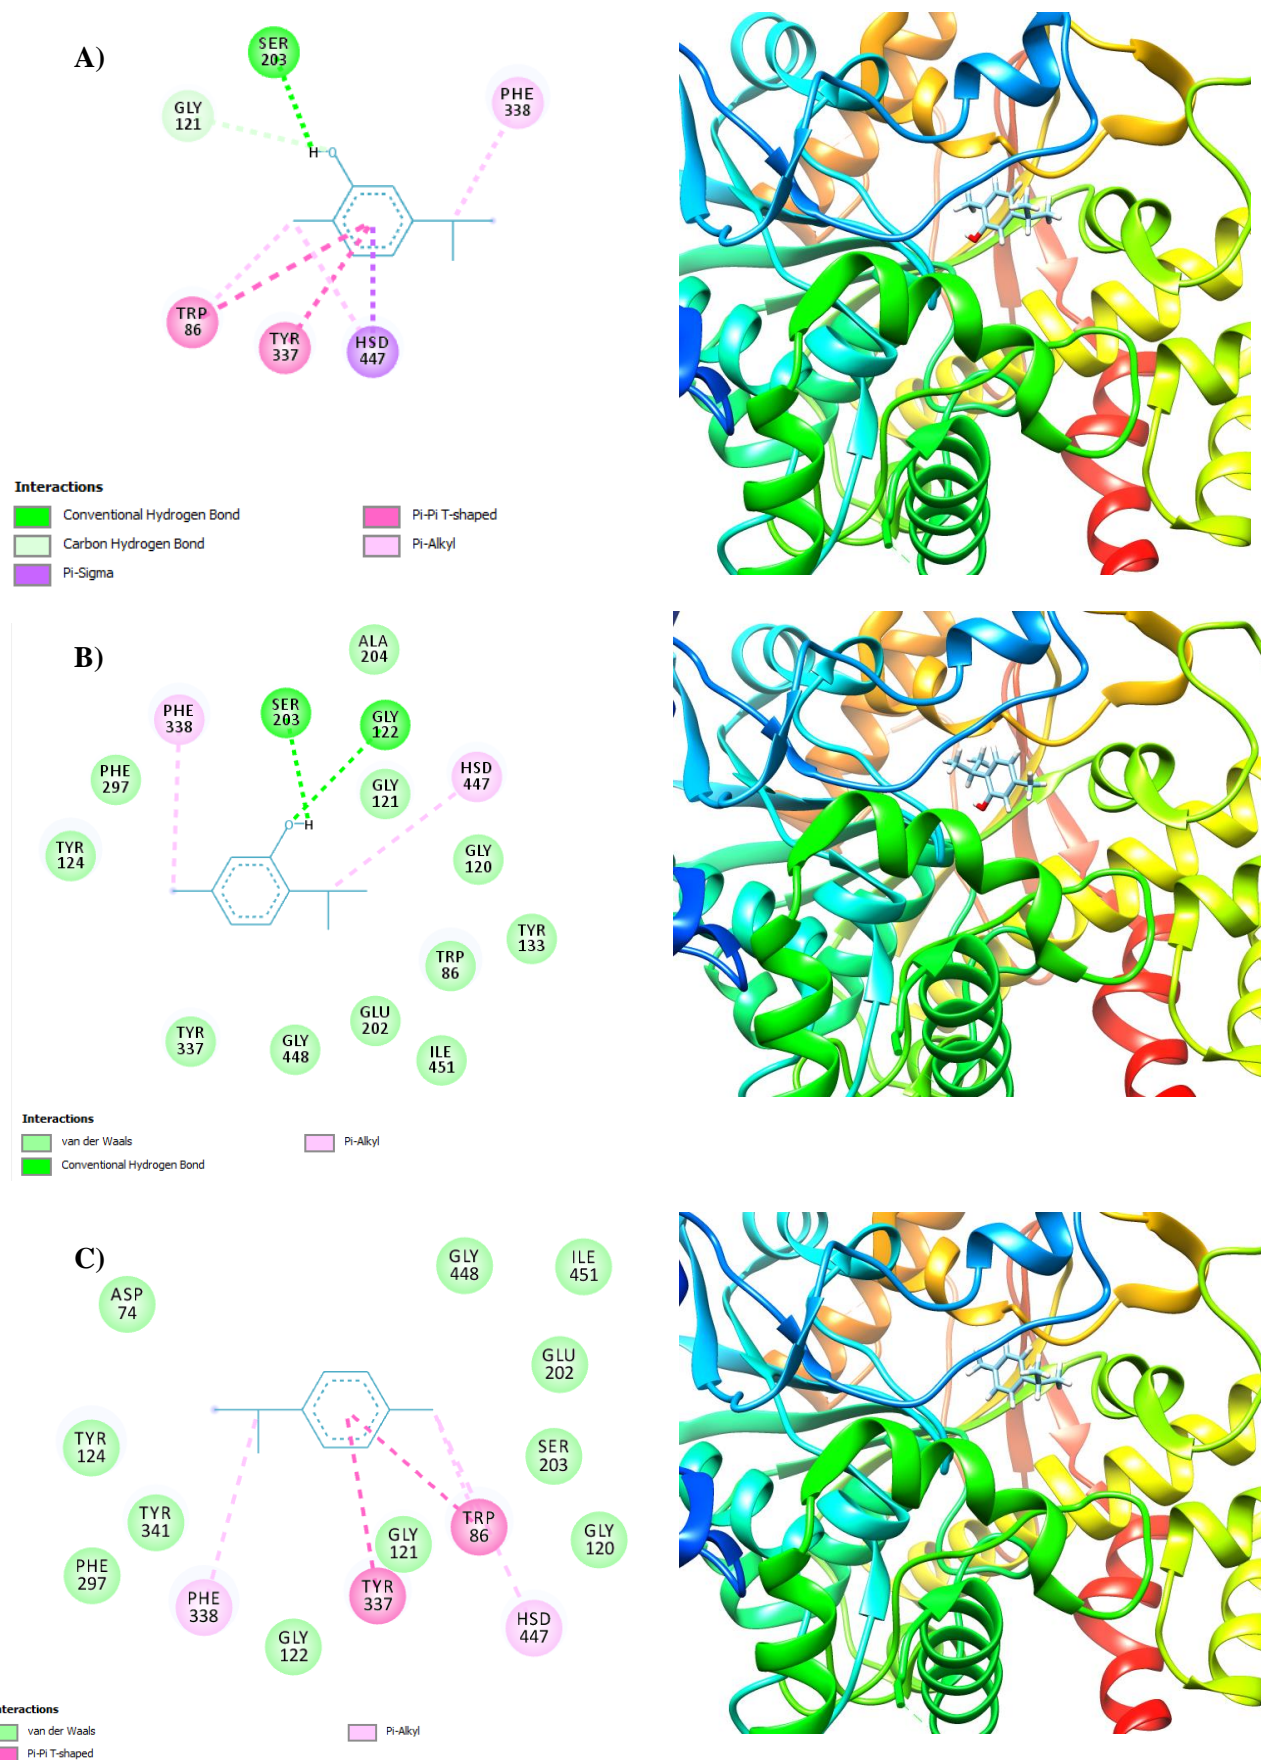

**Figure S3:** Schematic representations of the molecular interactions of the carvacrol (A), thymol (B) and p-cymene (C) molecules with amino acid residues of the NAG site of AChE.

A)

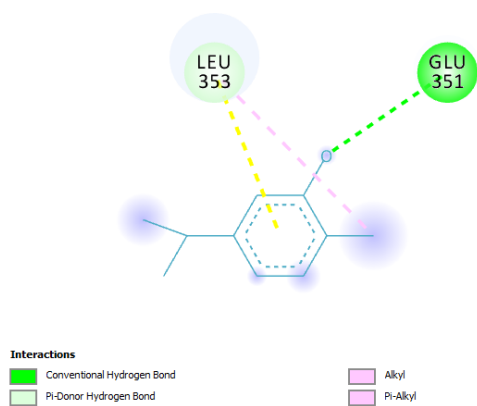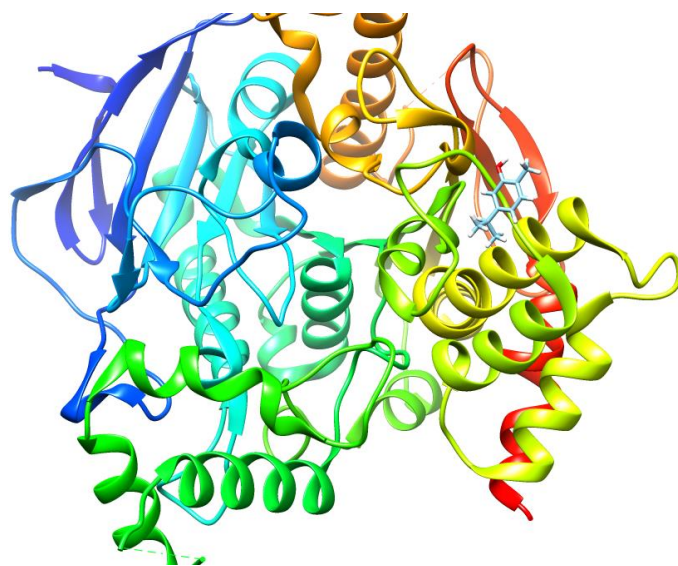

B)

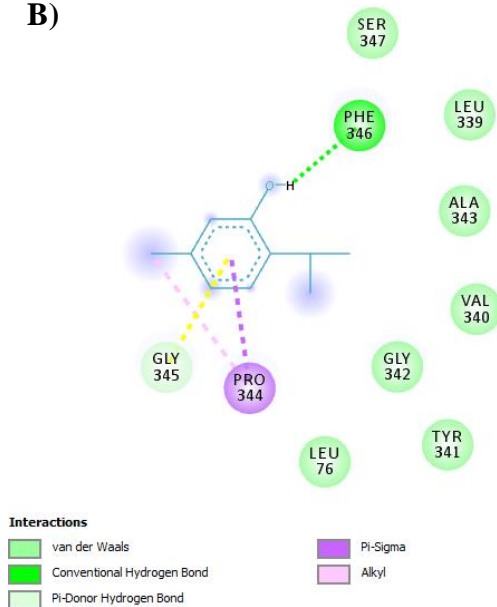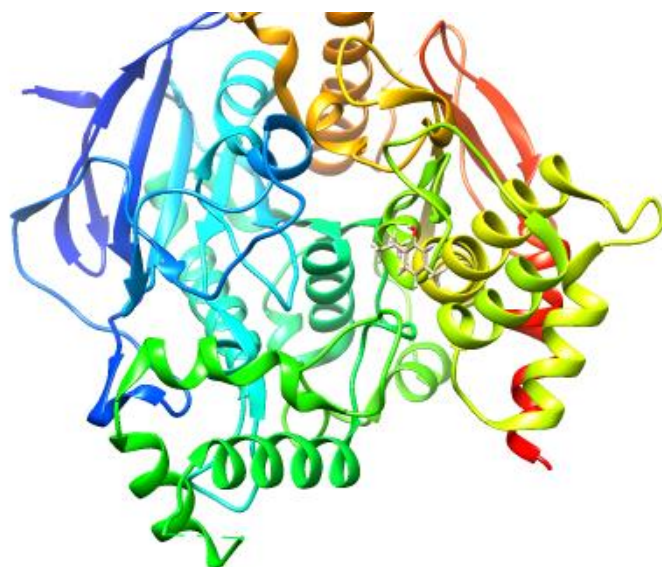

C)

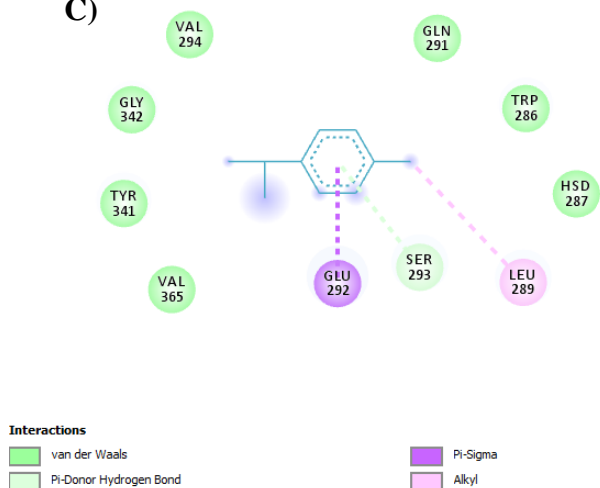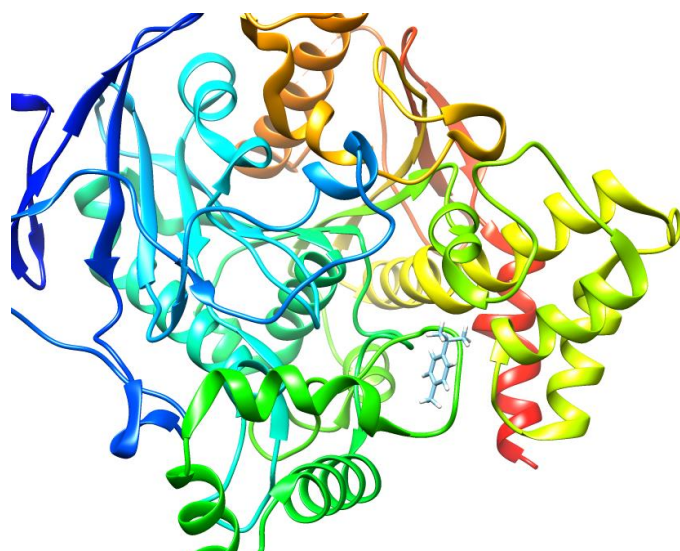

Supplement: Supplementary file 1 [file supplementary]
